# Supplementary material
Source: PubMed Central journal article supplement (PMC8315948)
Supplement: aac.00019-21-s000s1.pdf [file aac.00019-21-s000s1.pdf]

## Supplemental Material

Table S1: Viral load measurements for RT-SHIV+ NHPs

| NHP ID | Sex | Drug regimen | Day* of peak pVL | Peak pVL (copies/mL) | Day* of ART start | Art start pVL (copies/mL) | MLN VL at necropsy (copies/10 <sup>6</sup> cells) | pVL at necropsy (copies/mL) |
|--------|-----|--------------|------------------|----------------------|-------------------|---------------------------|---------------------------------------------------|-----------------------------|
| 42226  | M   | FTER         | 21               | 250,000              | 42                | 28,000                    | 7,529                                             | 7.5                         |
| 42971  | M   | FTER         | 21               | 1,500,000            | 42                | 97,000                    | 2,736                                             | 380                         |
| 40437  | M   | FTER         | 14               | 6,900,000            | 42                | 1,100,000                 | 50,458                                            | 1,900                       |
| 42707  | F   | FTER         | 14               | 16,000,000           | 42                | 190,000                   | 193,323                                           | 340                         |
| 40422  | F   | FTER         | 21               | 1,200,000            | 42                | 130,000                   | 109,035                                           | 3,800                       |
| 42827  | M   | FTMA         | 14               | 9,800,000            | 42                | 130,000                   | 27,940                                            | 1,100                       |
| 41380  | M   | FTMA         | 14               | 60,000,000           | 42                | 3,000,000                 | 5,416,860                                         | 68,000                      |
| 42966  | M   | FTMA         | 14               | 11,000,000           | 42                | 4,400,000                 | 940,280                                           | 19,000                      |
| 42350  | F   | FTMA         | 14               | 13,000,000           | 42                | 150,000                   | 17,167                                            | 2,200                       |
| 42706  | F   | FTMA         | 14               | 17,000,000           | 42                | 2,400,000                 | 302,243                                           | 30,000                      |

Table S2: Physicochemical properties of ARVs

| ARV | Molecular weight (g/mol) | Lipophilicity (LogP) | Solubility (mg/mL) |
|-----|--------------------------|----------------------|--------------------|
| FTC | 247.25                   | -0.43                | 112                |
| TFV | 287.21                   | -1.6                 | 13.4               |
| EFV | 315.67                   | 4.6                  | 0.00855            |
| RAL | 445.16                   | 0.5                  | 4.45               |
| MVC | 513.7                    | 5.1                  | 0.0106             |
| ATV | 704.9                    | 5.6                  | 0.0001             |

Figure S1

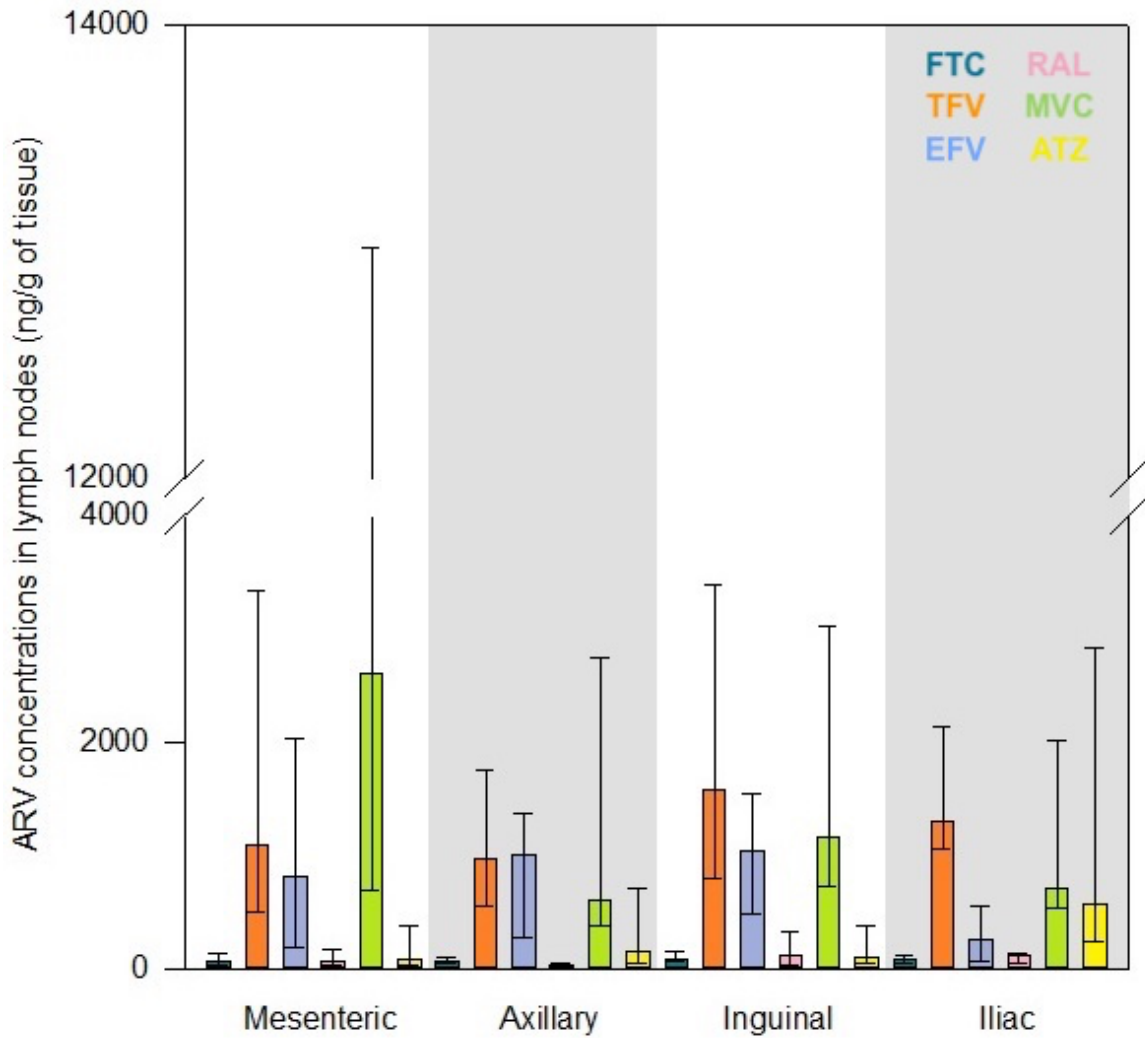

Figure S1: ARV concentrations in four different lymph node types. Bars are median, and error bars are 25<sup>th</sup> and 75<sup>th</sup> percentile.
